# Supplementary material
Source: Springer Nature journal article supplement (https://www.springermedizin.de/resource/supplementary/13031_2013_128_MOESM2_ESM.pdf/9645216)
Supplement: MOESM2 [file 9645216]

Table 2. APAI descriptive statistics and between group test of means

|                          | Total        |         | Program Reintegration |         | Self-Reintegration |         | T-test  |
|--------------------------|--------------|---------|-----------------------|---------|--------------------|---------|---------|
|                          | mean (sd)    | Min/Max | mean (sd)             | Min/Max | mean (sd)          | Min/Max | p-value |
| APAI Total               | 20.34 (8.96) | 3/40    | 20.67 (9.36)          | 4/40    | 20.09 (8.69)       | 3/37    | 0.562   |
| Depression - <i>Kumu</i> | 12.84 (4.79) | 3/27    | 13.18 (5.04)          | 4/27    | 12.58 (4.60)       | 3/24    | 0.484   |
| Anxiety - <i>Ma Lwor</i> | 8.76 (5.14)  | 0/19    | 8.75 (5.47)           | 0/19    | 8.76 (4.91)        | 0/19    | 0.990   |

N.B. Higher scores denote greater burden of mental illness
